# Supplementary material for: Phosphorylation of Notch1 by Pim kinases promotes oncogenic signaling in breast and prostate cancer cells
Source: Oncotarget. 2016 May 7;7(28):43220–38. doi: 10.18632/oncotarget.9215 (PMC5190019; doi:10.18632/oncotarget.9215)
Supplement: Supplementary file 1 [file oncotarget-07-43220-s001.pdf]

# Phosphorylation of Notch1 by Pim kinases promotes oncogenic signaling in breast and prostate cancer cells

## SUPPLEMENTARY FIGURES AND TABLE

**A**

Breast cancer

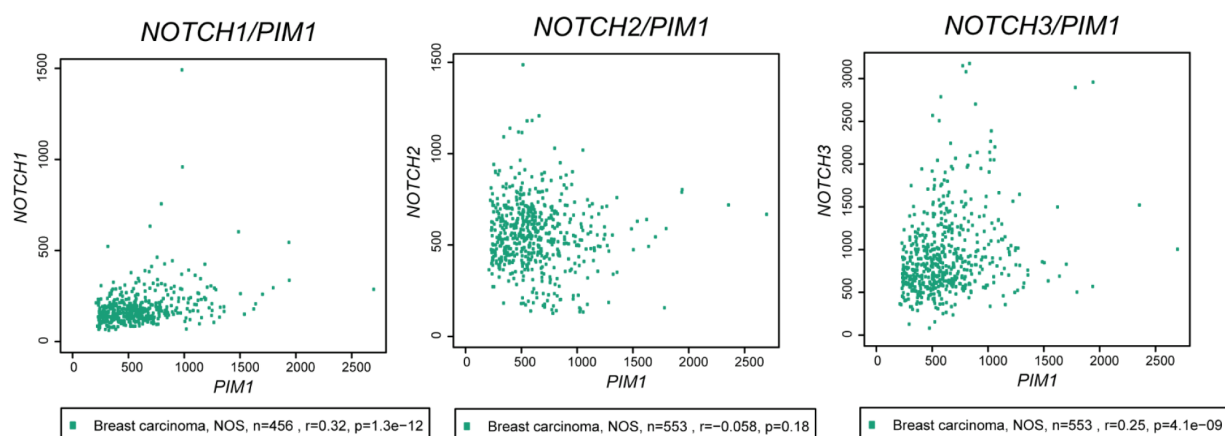

**B**

Prostate cancer

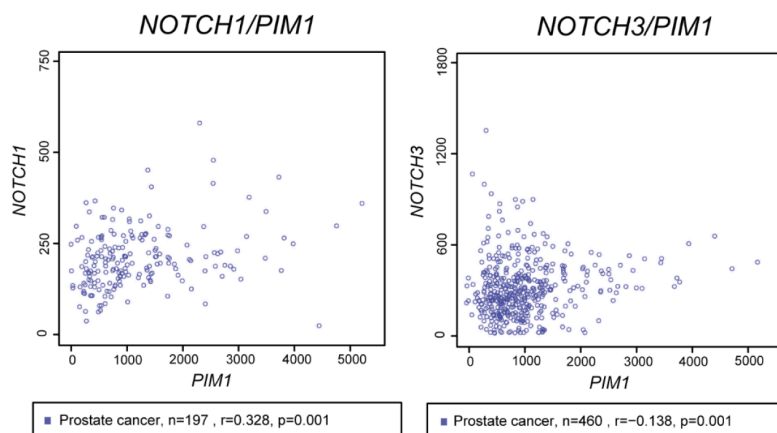

**Supplementary Figure S1: *PIM1* expression correlates with *NOTCH1* and *NOTCH3* in breast and prostate cancer samples.** Correlation of *PIM1* and *NOTCH* mRNA levels were determined from patient samples according to information from MediSapiens.com. **A.** *NOTCH1*, *NOTCH2*, *NOTCH3* and *PIM1* expression were found in breast cancer samples. **B.** *NOTCH1*, *NOTCH3* and *PIM1* expression were found in prostate cancer samples.

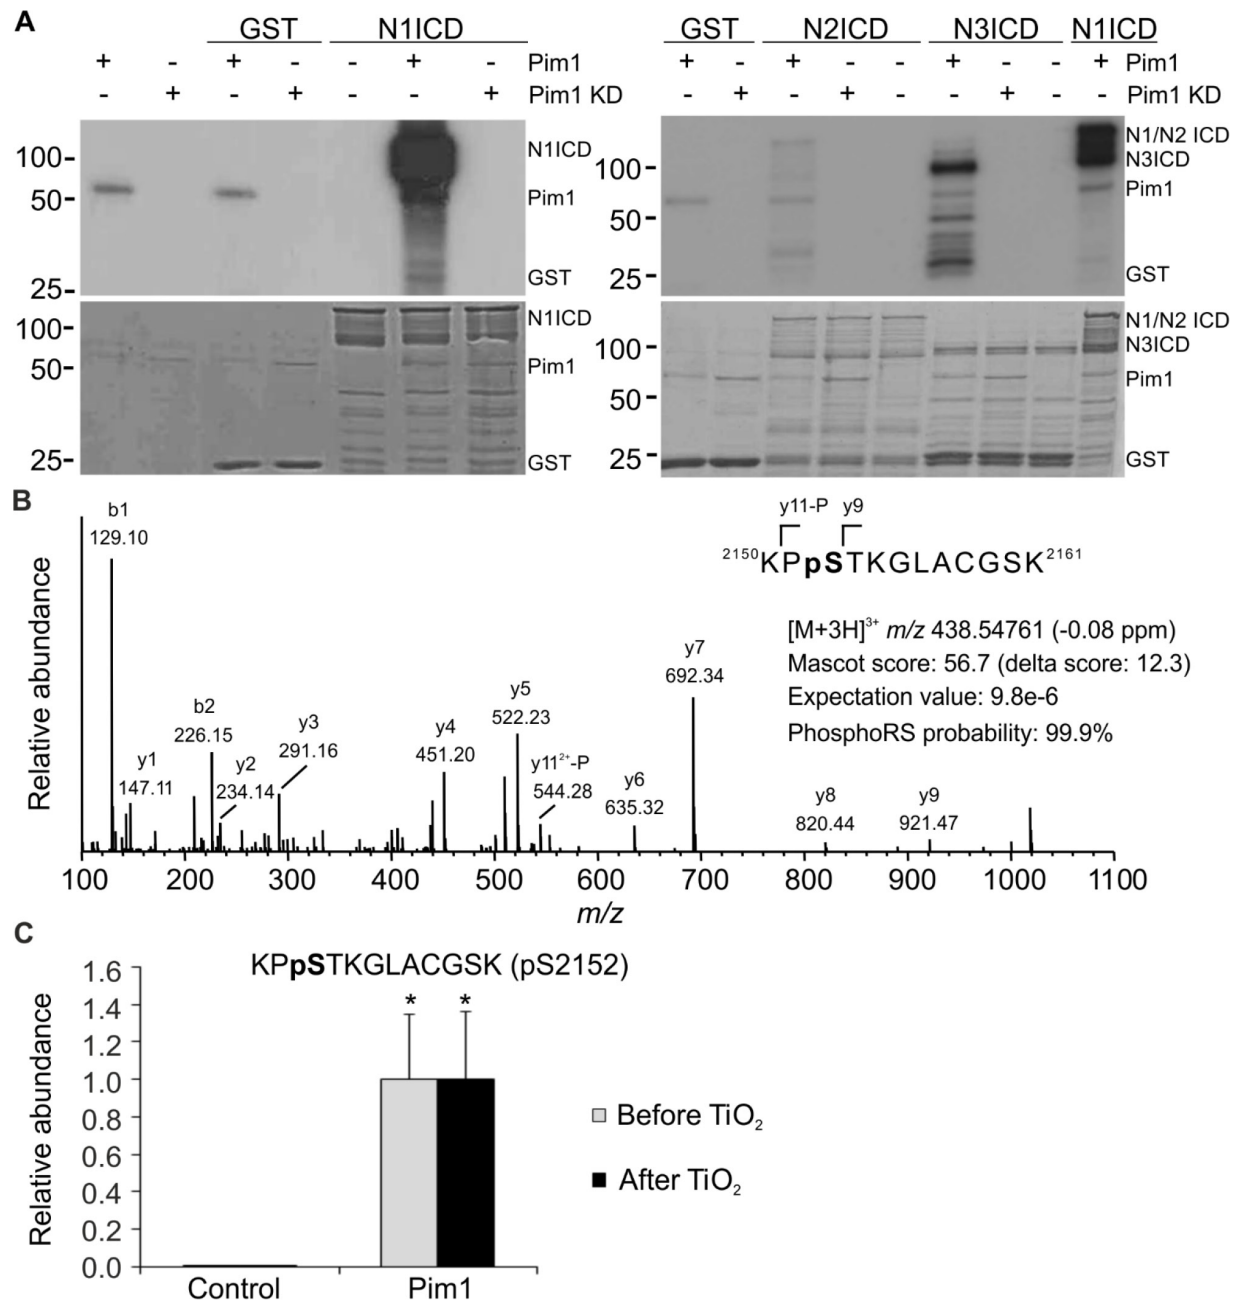

**Supplementary Figure S2: Notch1 is phosphorylated by Pim1 at serine 2152.** GST-tagged Pim1, its kinase-deficient (KD) mutant and Notch (N) intracellular domains were incubated in *in vitro* kinase reactions. **A.** Shown are autoradiograms (above) and protein staining (below). **B.** Tryptic digestion and  $TiO_2$  phosphopeptide enrichment followed by mass spectrometry revealed S2152 phosphorylation and C2158 carbamidomethylation in N1ICD. **C.** Shown is label-free phosphopeptide quantification normalized to N1ICD abundance (n=3).

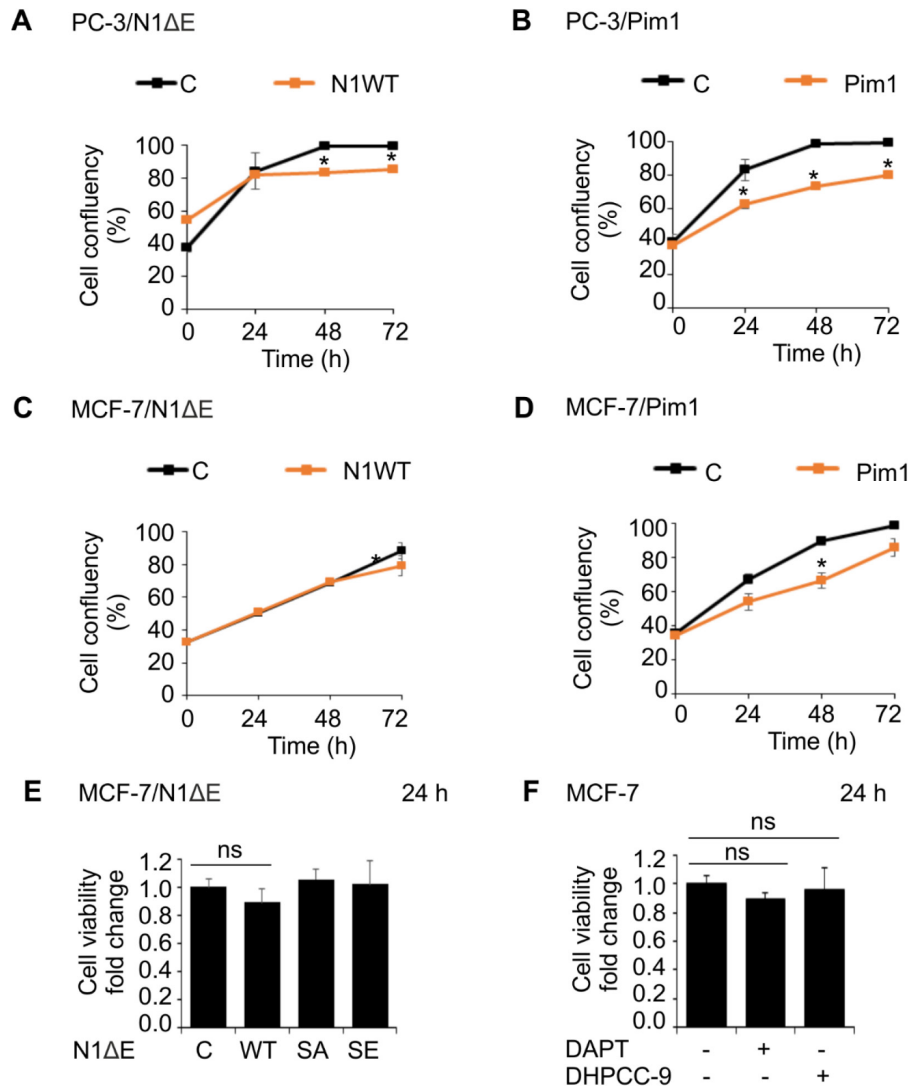

**Supplementary Figure S3: Notch and Pim activity in PC-3 and MCF-7 cell proliferation or viability.** Cells were transiently transfected with N1ΔE wild-type (WT) or phosphomutants (SA and SE) or Pim1. **A.** Confluency of N1ΔE-overexpressing PC-3 cells. **B.** Confluency of Pim1-overexpressing PC-3 cells. **C.** Confluency of N1ΔE-overexpressing MCF-7 cells. **D.** Confluency of Pim1-overexpressing MCF-7 cells. Various cell concentrations were tested with similar results and shown are average results with one concentration and parallel samples. **E.** Cell viability was analysed in MCF-7 cells by MTT assays after N1ΔE overexpression. **F.** Untransfected MCF-7 cells were also treated with 5 μg/ml of DAPT or 10 μM DHPCC-9, after which MTT assays were performed. Shown are combined results from at least two independent experiments. One day after transfection was considered as the 0 h time-point.

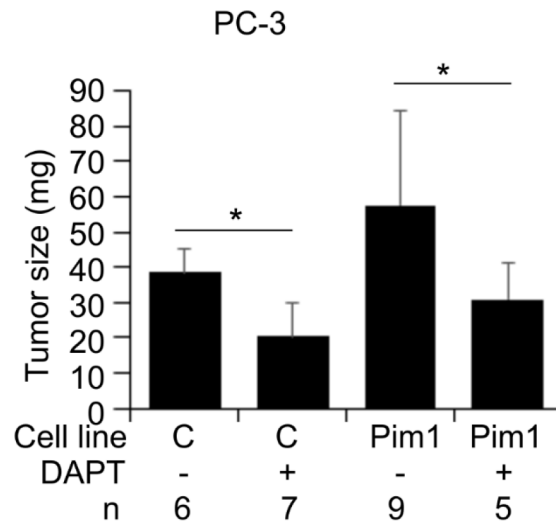

**Supplementary Figure S4: DAPT decreases Pim1-induced PC-3 tumor growth on CAM.** Stable control (C) or Pim1-overexpressing (Pim1) PC-3 cells were grown on the chorioallantoic membranes (CAM) of chicken embryos. Tumors were treated for 5 days with 5  $\mu$ g/ml of DAPT or they were control-treated with equal amounts of DMSO. Shown are sample numbers (n) and average tumor sizes from one experiment.

**Supplementary Table S1: Pim target sites are highly conserved in Notch receptors**

| Amino acids in comparison | Amino acid sequence comparison | Accession number | Notch member | Species |
|---------------------------|--------------------------------|------------------|--------------|---------|
| 2145-2157                 | GKKARK--PSTK---GLA             | Q01705           | Notch1       | mouse   |
| 2155-2167                 | GKKVRK--PSSK---GLA             | P46531           | Notch1       | human   |
| 2098-2115                 | GKKARRPNTKSTMPTSLP             | O35516           | Notch2       | mouse   |
| 2100-2117                 | GKKSRPSPAKSTMPTSLP             | Q04721           | Notch2       | human   |
| 2060-2074                 | GTKKSRRPPGKT---GLG             | Q61982           | Notch3       | mouse   |
| 2059-2073                 | GSKKSRRPPGKA---GLG             | Q9UM47           | Notch3       | human   |
| 1834-1848                 | GGAAARC---RTLSAGAR             | P31695           | Notch4       | mouse   |
| 1855-1869                 | GGALPRC---RTLSAGAG             | Q99466           | Notch4       | human   |

Shown are sequence homologies between different Notch family members around Pim target site S2152 in mouse Notch1. Sequence data is received from UniProtKB/Swiss-Prot.
